# Supplementary material for: Exploring the substrate specificity of OxyB, a phenol coupling P450 enzyme involved in vancomycin biosynthesis
Source: Royal Society of Chemistry journal article supplement (doi:10.1039/b805956j), 2008-01-01
Supplement: b805956j.pdf [file b805956j.pdf]

## Supplementary Material

**Exploring the Substrate Specificity of OxyB, a Phenol Coupling P450 Enzyme Involved in Vancomycin Biosynthesis****Katharina Woithe, Nina Geib, Odile Meyer, Tanja Wörtz, Katja Zerbe and John A. Robinson**

Chemistry Department, University of Zurich, Winterthurerstrasse 190, 8057 Zurich, Switzerland.

**Peptide synthesis**

Peptides were synthesized as described. Relevant analytical data for each new compound are given below.

*Pentapeptide 5A*<sup>1</sup>H-NMR Chemical shift assignments (600 MHz, at 300 K, DMSO-d<sub>6</sub>).

| Residue          | NH   | C(α)-H | C(β)-H     | Others                                    |
|------------------|------|--------|------------|-------------------------------------------|
| Tyr <sup>1</sup> | 8.05 | 4.39   | 2.60, 2.83 | C(δ)H=7.01, C(ε)H=6.63, OH=9.15, NAc=1.73 |
| Asn <sup>2</sup> | 8.32 | 4.60   | 2.32, 2.44 | N(δ)H=6.90, 7.30                          |
| Hpg <sup>3</sup> | 8.03 | 5.51   | -          | C(γ)H=7.18, C(δ)H=6.67, OH=9.34           |
| Hpg <sup>4</sup> | 8.72 | 5.44   | -          | C(γ)H=7.08, C(δ)H=6.65, OH=9.36           |
| Tyr <sup>5</sup> | 8.33 | 4.26   | 2.65, 2.79 | C(δ)H=6.74, C(ε)H=6.52, OH=9.17           |
| COOH             | -    | -      | -          | 12.73                                     |

ESI-MS (MeCN/H<sub>2</sub>O 1:1 + HCOOH 0.1%): *m/z* = 799.4 ([M+H]<sup>+</sup>).*Tetrapeptide 6A*<sup>1</sup>H-NMR Chemical shift assignments (600 MHz, at 300 K, DMSO-d<sub>6</sub>).

| Residue          | NH   | C(α)-H | C(β)-H     | Others                          |
|------------------|------|--------|------------|---------------------------------|
| Asn <sup>1</sup> | 8.12 | 4.61   | 2.29, 2.46 | N(δ)H=6.88, 7.29, NAc=1.83      |
| Hpg <sup>2</sup> | 8.04 | 5.49   | -          | C(γ)H=7.16, C(δ)H=6.67, OH=9.35 |
| Hpg <sup>3</sup> | 8.69 | 5.42   | -          | C(γ)H=7.07, C(δ)H=6.65, OH=9.36 |
| Tyr <sup>4</sup> | 8.30 | 4.25   | 2.64, 2.80 | C(δ)H=6.75, C(ε)H=6.52, OH=9.17 |

ESI-MS (MeCN/H<sub>2</sub>O 1:1 + HCOOH 0.1%):  $m/z = 636.2$  ( $[M+H]^+$ ).

*Tripeptide 7A*

<sup>1</sup>H-NMR Chemical shift assignments (600 MHz, at 300 K, DMSO-d<sub>6</sub>).

| Residue          | NH   | C(α)-H | C(β)-H     | Others                                       |
|------------------|------|--------|------------|----------------------------------------------|
| Hpg <sup>1</sup> | 8.33 | 5.52   | -          | C(γ)H=7.18, C(δ)H=6.68, OH=9.35,<br>NAc=1.85 |
| Hpg <sup>2</sup> | 8.56 | 5.52   | -          | C(γ)H=7.05, C(δ)H=6.64, OH=9.34              |
| Tyr <sup>3</sup> | 8.34 | 4.25   | 2.65, 2.81 | C(δ)H=6.76, C(ε)H=6.52, OH=9.17              |

ESI-MS (MeCN/H<sub>2</sub>O 1:1 + HCOOH 0.1%):  $m/z = 522.2$  ( $[M+H]^+$ ).

*Tetrapeptide 8A*

<sup>1</sup>H-NMR Chemical shift assignments (500 MHz, at 300 K, DMSO-d<sub>6</sub>).

| Residue          | NH   | C(α)-H | C(β)-H     | Others                          |
|------------------|------|--------|------------|---------------------------------|
| Ala <sup>1</sup> | 8.36 | 5.54   | 1.14       | NAc=1.83                        |
| Hpg <sup>2</sup> | 8.25 | 5.52   | -          | C(γ)H=7.17, C(δ)H=6.68, OH=9.33 |
| Hpg <sup>3</sup> | 8.62 | 5.43   | -          | C(γ)H=7.07, C(δ)H=6.65, OH=9.33 |
| Tyr <sup>4</sup> | 8.28 | 4.26   | 2.66, 2.80 | C(δ)H=6.76, C(ε)H=6.53, OH=9.15 |
| COOH             | -    | -      | -          | 12.69                           |

ESI-MS (MeCN/H<sub>2</sub>O 1:1 + HCOOH 0.1%):  $m/z = 593.3$  ( $[M+H]^+$ ), 615.3 ( $[M+Na]^+$ ), 631.3 ( $[M+K]^+$ ).

*Tetrapeptide 9A*

<sup>1</sup>H-NMR Chemical shift assignments (500 MHz, at 300 K, DMSO-d<sub>6</sub>).

| Residue          | NH   | C(α)-H | C(β)-H | Others                                       |
|------------------|------|--------|--------|----------------------------------------------|
| Hpg <sup>1</sup> | 8.36 | 5.54   | -      | C(γ)H=7.18, C(δ)H=6.65, OH=9.34,<br>NAc=1.87 |

|                  |      |      |            |                                                     |
|------------------|------|------|------------|-----------------------------------------------------|
| Hpg <sup>2</sup> | 8.58 | 5.50 | -          | C( $\gamma$ )H=7.05, C( $\delta$ )H=6.61, OH=9.31   |
| Hpg <sup>3</sup> | 8.63 | 5.44 | -          | C( $\gamma$ )H=7.08, C( $\delta$ )H=6.65, OH=9.31   |
| Tyr <sup>4</sup> | 8.29 | 4.26 | 2.66, 2.81 | C( $\delta$ )H=6.77, C( $\epsilon$ )H=6.53, OH=9.15 |
| COOH             | -    | -    | -          | 12.69                                               |

ESI-MS (MeCN/H<sub>2</sub>O 1:1 + HCOOH 0.1%):  $m/z = 671.4$  ([M+H]<sup>+</sup>).

#### Hexapeptide 10A

<sup>1</sup>H-NMR Chemical shift assignments (600 MHz, at 300 K, DMSO-d<sub>6</sub>).

| Residue          | NH   | C( $\alpha$ )-H | C( $\beta$ )-H | Others                                                                 |
|------------------|------|-----------------|----------------|------------------------------------------------------------------------|
| Leu <sup>1</sup> | 8.62 | 3.57            | 1.49, 1.38     | C( $\gamma$ )H=1.49, C( $\delta$ )H <sub>3</sub> =0.78, 0.84, NMe=1.96 |
| Tyr <sup>2</sup> | 8.81 | 4.76            | 2.96, 2.58     | C( $\delta$ )H=7.04, C( $\epsilon$ )H=6.62, OH=9.17                    |
| Asn <sup>3</sup> | 8.45 | 4.68            | 2.47, 2.33     | N( $\delta$ )H=7.41, 6.92                                              |
| Hpg <sup>4</sup> | 8.08 | 5.52            | -              | C( $\gamma$ )H=7.18, C( $\delta$ )H=6.67, OH=9.34                      |
| Hpg <sup>5</sup> | 8.77 | 5.46            | -              | C( $\gamma$ )H=7.06, C( $\delta$ )H=6.61, OH=9.34                      |
| Trp <sup>6</sup> | 8.34 | 4.38            | 2.89, 3.02     | C( $\delta$ )H=7.02, C( $\epsilon$ )H=7.30, C( $\phi$ )H=6.85          |

ESI-MS (MeCN/H<sub>2</sub>O 1:1 + HCOOH 0.1%):  $m/z = 907.6$  ([M+H]<sup>+</sup>).

#### Tripeptide 11A

<sup>1</sup>H-NMR Chemical shift assignments (500 MHz, at 300 K, DMSO-d<sub>6</sub>).

| Residue          | NH   | C( $\alpha$ )-H | C( $\beta$ )-H | Others                                                           |
|------------------|------|-----------------|----------------|------------------------------------------------------------------|
| Tyr <sup>1</sup> | 7.92 | 4.36            | 2.53, 2.80     | C( $\delta$ )H=6.97, C( $\epsilon$ )H=6.61, OH=9.15,<br>NAc=1.71 |
| Tyr <sup>2</sup> | 7.86 | 4.43            | 2.65, 2.88     | C( $\delta$ )H=6.99, C( $\epsilon$ )H=6.61, OH=9.15              |
| Tyr <sup>3</sup> | 8.10 | 4.37            | 2.83, 2.93     | C( $\delta$ )H=7.02, C( $\epsilon$ )H=6.66, OH=9.15              |
| COOH             | -    | -               | -              | 12.64                                                            |

ESI-MS (MeCN/H<sub>2</sub>O 1:1 + HCOOH 0.1%):  $m/z = 550.2$  ([M+H]<sup>+</sup>).

*Tripeptide 12A*<sup>1</sup>H-NMR Chemical shift assignments (500 MHz, at 300 K, DMSO-d<sub>6</sub>).

| Residue          | NH   | C(α)-H | C(β)-H     | Others                                       |
|------------------|------|--------|------------|----------------------------------------------|
| Tyr <sup>1</sup> | 7.91 | 4.35   | 2.53, 2.79 | C(δ)H=6.96, C(ε)H=6.60, OH=9.10,<br>NAc=1.72 |
| Tyr <sup>2</sup> | 7.74 | 4.45   | 2.49, 2.69 | C(δ)H=6.79, C(ε)H=6.56, OH=9.10              |
| Tyr <sup>3</sup> | 8.26 | 4.33   | 2.71, 2.95 | C(δ)H=7.02, C(ε)H=6.64, OH=9.16              |
| COOH             | -    | -      | -          | 12.70                                        |

ESI-MS (MeCN/H<sub>2</sub>O 1:1 + HCOOH 0.1%): *m/z* = 550.2 ([M+H]<sup>+</sup>).**Synthesis of peptide-PCP-7S conjugates**

Peptide-PCP-7S conjugates were made as described. Thioester products were analyzed by MS and 1D/2D <sup>1</sup>H-NMR spectroscopy. NMR assignments were made by standard methods, using 2D DQF-COSY, TOCSY and NOESY spectra. Relevant analytical data for the thioester intermediates are given below.

*Pentapeptide-S-phenylthioester 5B*<sup>1</sup>H-NMR Chemical shift assignments (600 MHz, at 300 K, DMSO-d<sub>6</sub>).

| Residue          | NH   | C(α)-H | C(β)-H     | Others                                       |
|------------------|------|--------|------------|----------------------------------------------|
| Tyr <sup>1</sup> | 8.03 | 4.39   | 2.57, 2.82 | C(δ)H=6.99, C(ε)H=6.62, OH=9.14,<br>NAc=1.71 |
| Asn <sup>2</sup> | 8.31 | 4.61   | 2.32, 2.43 | N(δ)H=6.92, 7.30                             |
| Hpg <sup>3</sup> | 8.00 | 5.56   | -          | C(γ)H=7.19, C(δ)H=6.59, OH=9.28              |
| Hpg <sup>4</sup> | 8.91 | 5.53   | -          | C(γ)H=7.01, C(δ)H=6.64, OH=9.36              |
| Tyr <sup>5</sup> | 9.00 | 4.44   | 2.73, 2.94 | C(δ)H=6.91, C(ε)H=6.57, OH=9.23              |
| COSPh            | -    | -      | -          | 7.27, 7.47                                   |

ESI-MS (MeCN/H<sub>2</sub>O 1:1 + HCOOH 0.1%): *m/z* = 891.3 ([M+H]<sup>+</sup>), 913.3 ([M+Na]<sup>+</sup>), 929.3 ([M+K]<sup>+</sup>).

*Tetrapeptide-S-phenylthioester 6B*<sup>1</sup>H-NMR Chemical shift assignments (500 MHz, at 300 K, DMSO-d<sub>6</sub>).

| Residue          | NH   | C(α)-H | C(β)-H     | Others                          |
|------------------|------|--------|------------|---------------------------------|
| Asn <sup>1</sup> | 8.11 | 4.62   | 2.30, 2.47 | N(δ)H=6.86, 7.03, NAc=1.82      |
| Hpg <sup>2</sup> | 8.02 | 5.53   | -          | C(γ)H=7.18, C(δ)H=6.61, OH=9.29 |
| Hpg <sup>3</sup> | 8.88 | 5.52   | -          | C(γ)H=7.02, C(δ)H=6.64, OH=9.35 |
| Tyr <sup>4</sup> | 8.98 | 4.45   | 2.74, 2.96 | C(δ)H=6.92, C(ε)H=6.57, OH=9.21 |
| COSPh            | -    | -      | -          | 7.27, 7.47                      |

ESI-MS (MeCN/H<sub>2</sub>O 1:1 + HCOOH 0.1%):  $m/z = 750.3$  ([M+Na]<sup>+</sup>).*Tripeptide-S-phenylthioester 7B*<sup>1</sup>H-NMR Chemical shift assignments (600 MHz, at 300 K, DMSO-d<sub>6</sub>).

| Residue          | NH   | C(α)-H | C(β)-H     | Others                                    |
|------------------|------|--------|------------|-------------------------------------------|
| Hpg <sup>1</sup> | 8.31 | 5.57   | -          | C(γ)H=7.21, C(δ)H=6.62, OH=9.31, NAc=1.85 |
| Hpg <sup>2</sup> | 8.76 | 5.54   | -          | C(γ)H=7.00, C(δ)H=6.64, OH=9.37           |
| Tyr <sup>3</sup> | 9.04 | 4.46   | 2.96, 2.75 | C(δ)H=6.93, C(ε)H=6.58, OH=9.25           |
| COSPh            | -    | -      | -          | 7.47, 7.28                                |

ESI-MS (MeCN/H<sub>2</sub>O 1:1 + HCOOH 0.1%):  $m/z = 636.3$  ([M+Na]<sup>+</sup>).*Tetrapeptide-S-phenylthioester 8B*<sup>1</sup>H-NMR Chemical shift assignments (500 MHz, at 300 K, DMSO-d<sub>6</sub>).

| Residue          | NH   | C(α)-H | C(β)-H     | Others                          |
|------------------|------|--------|------------|---------------------------------|
| Ala <sup>1</sup> | 8.01 | 4.38   | 1.14       | NAc=1.82                        |
| Hpg <sup>2</sup> | 8.26 | 5.57   | -          | C(γ)H=7.19, C(δ)H=6.64, OH=9.30 |
| Hpg <sup>3</sup> | 8.84 | 5.53   | -          | C(γ)H=7.02, C(δ)H=6.63, OH=9.36 |
| Tyr <sup>4</sup> | 8.99 | 4.45   | 2.75, 2.95 | C(δ)H=6.92, C(ε)H=6.58, OH=9.23 |
| COSPh            | -    | -      | -          | 7.27, 7.47                      |

ESI-MS (MeCN/H<sub>2</sub>O 1:1 + HCOOH 0.1%):  $m/z = 685.4$  ([M+H]<sup>+</sup>).

*Tetrapeptide-S-phenylthioester 9B*

<sup>1</sup>H-NMR Chemical shift assignments (500 MHz, at 300 K, DMSO-d<sub>6</sub>).

| Residue          | NH   | C(α)-H | C(β)-H     | Others                                       |
|------------------|------|--------|------------|----------------------------------------------|
| Hp <sup>g1</sup> | 8.35 | 5.56   | -          | C(γ)H=7.18, C(δ)H=6.65, OH=9.31,<br>NAc=1.86 |
| Hp <sup>g2</sup> | 8.57 | 5.56   | -          | C(γ)H=7.06, C(δ)H=6.54, OH=9.26              |
| Hp <sup>g3</sup> | 8.83 | 5.54   | -          | C(γ)H=7.02, C(δ)H=6.64, OH=9.35              |
| Tyr <sup>4</sup> | 8.99 | 4.46   | 2.75, 2.97 | C(δ)H=6.93, C(ε)H=6.58, OH=9.21              |
| COSPh            | -    | -      | -          | 7.28, 7.47                                   |

ESI-MS (MeCN/H<sub>2</sub>O 1:1 + HCOOH 0.1%):  $m/z = 763.4$  ([M+H]<sup>+</sup>).

*Hexapeptide-S-phenylthioester 10B*

<sup>1</sup>H-NMR Chemical shift assignments (600 MHz, at 300 K, DMSO-d<sub>6</sub>).

| Residue          | NH   | C(α)-H | C(β)-H     | Others                                                     |
|------------------|------|--------|------------|------------------------------------------------------------|
| Leu <sup>1</sup> | 8.63 | 3.56   | 1.49, 1.37 | C(γ)H=1.49, C(δ)H <sub>3</sub> =0.77, 0.83, NMe=1.94       |
| Tyr <sup>2</sup> | 8.78 | 4.77   | 2.97, 2.57 | C(δ)H=7.04, C(ε)H=6.62, OH=9.17                            |
| Asn <sup>3</sup> | 8.46 | 4.69   | 2.47, 2.33 | N(δ)H=7.30, 6.93                                           |
| Hp <sup>g4</sup> | 8.07 | 5.58   | -          | C(γ)H=7.20, C(δ)H=6.60, OH=9.30                            |
| Hp <sup>g5</sup> | 8.95 | 5.55   | -          | C(γ)H=7.01, C(δ)H=6.60, OH=9.33                            |
| Trp <sup>6</sup> | 9.00 | 4.54   | 3.19, 3.02 | C(δ)H=7.68, C(ε)H=7.33, 7.43, C(φ)H=6.95,<br>7.06, NH=9.37 |
| COSPh            | -    | -      | -          | 7.45, 7.24                                                 |

ESI-MS (MeCN/H<sub>2</sub>O 1:1 + HCOOH 0.1%):  $m/z = 999.5$  ([M+H]<sup>+</sup>), 1021.5 ([M+Na]<sup>+</sup>).

*Tripeptide-S-phenylthioester 11B*

<sup>1</sup>H-NMR Chemical shift assignments (600 MHz, at 300 K, DMSO-d<sub>6</sub>).

| Residue          | NH   | C( $\alpha$ )-H | C( $\beta$ )-H | Others                                                           |
|------------------|------|-----------------|----------------|------------------------------------------------------------------|
| Tyr <sup>1</sup> | 7.94 | 4.38            | 2.53, 2.80     | C( $\delta$ )H=6.96, C( $\epsilon$ )H=6.59, OH=9.13,<br>NAc=1.72 |
| Tyr <sup>2</sup> | 8.00 | 4.51            | 2.69, 2.97     | C( $\delta$ )H=7.02, C( $\epsilon$ )H=6.62, OH=9.16              |
| Tyr <sup>3</sup> | 8.75 | 4.59            | 2.91, 3.01     | C( $\delta$ )H=7.05, C( $\epsilon$ )H=6.66, OH=9.23              |
| COSPh            | -    | -               | -              | 7.46, 7.32                                                       |

ESI-MS (MeCN/H<sub>2</sub>O 1:1 + HCOOH 0.1%):  $m/z$  = 642.4 ([M+H]<sup>+</sup>), 664.4 ([M+Na]<sup>+</sup>), 680.3 ([M+K]<sup>+</sup>).

### *Tripeptide-S-phenylthioester 12B*

<sup>1</sup>H-NMR Chemical shift assignments (600 MHz, at 300 K, DMSO-d<sub>6</sub>).

| Residue          | NH   | C( $\alpha$ )-H | C( $\beta$ )-H | Others                                                           |
|------------------|------|-----------------|----------------|------------------------------------------------------------------|
| Tyr <sup>1</sup> | 7.93 | 4.40            | 2.53, 2.83     | C( $\delta$ )H=6.97, C( $\epsilon$ )H=6.66, OH=9.12,<br>NAc=1.72 |
| Tyr <sup>2</sup> | 7.93 | 4.51            | 2.53, 2.67     | C( $\delta$ )H=6.84, C( $\epsilon$ )H=6.59, OH=9.14              |
| Tyr <sup>3</sup> | 8.84 | 4.57            | 2.79, 3.05     | C( $\delta$ )H=7.08, C( $\epsilon$ )H=6.66, OH=9.22              |
| COSPh            | -    | -               | -              | 7.45, 7.34                                                       |

ESI-MS (MeCN/H<sub>2</sub>O 1:1 + HCOOH 0.1%):  $m/z$  = 642.3 ([M+H]<sup>+</sup>).

### *Pentapeptide-S-CoA thioester 5C*

<sup>1</sup>H-NMR Chemical shift assignments (700 MHz, at 300 K, DMSO-d<sub>6</sub>) using the following nomenclature for the phosphopantetheinyl moiety.

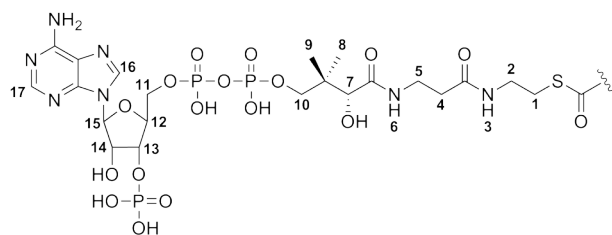

| Residue          | NH   | C( $\alpha$ )-H | C( $\beta$ )-H | Others                                               |
|------------------|------|-----------------|----------------|------------------------------------------------------|
| Tyr <sup>1</sup> | 8.03 | 4.39            | 2.58, 2.83     | C( $\delta$ )H=7.00, C( $\epsilon$ )H=6.62, NAc=1.72 |

|                  |      |      |            |                                                                                                                                                                              |
|------------------|------|------|------------|------------------------------------------------------------------------------------------------------------------------------------------------------------------------------|
| Asn <sup>2</sup> | 8.31 | 4.60 | 2.33, 2.44 | N( $\delta$ )H=6.93, 7.30                                                                                                                                                    |
| Hpg <sup>3</sup> | 8.01 | 5.53 | -          | C( $\gamma$ )H=7.17, C( $\delta$ )H=6.66                                                                                                                                     |
| Hpg <sup>4</sup> | 8.81 | 5.48 | -          | C( $\gamma$ )H=6.97, C( $\delta$ )H=6.62                                                                                                                                     |
| Tyr <sup>5</sup> | 8.83 | 4.34 | 2.64, 2.90 | C( $\delta$ )H=6.87, C( $\epsilon$ )H=6.55                                                                                                                                   |
| COSCoA           | -    | -    | -          | 1=2.80, 2.83, 2=3.11, 3=8.14, 4=2.28,<br>5=3.25, 3.33, 6=7.77, 7=3.76, 8=0.75,<br>9=0.95, 10=3.52, 3.91, 11=4.17, 12=4.39,<br>13=4.81, 14=4.72, 15=5.95, 16=8.58,<br>17=8.32 |

negative-ion ESI-MS:  $m/z = 1546.3$  ( $[M-H]^-$ ),  $1568.3$  ( $[M+Na-2H]^-$ ),  $1584.2$  ( $[M+K-2H]^-$ ).

*Tetrapeptide-S-CoA thioester 6C*

<sup>1</sup>H-NMR Chemical shift assignments (500 MHz, at 300 K, DMSO-d<sub>6</sub>).

| Residue          | NH   | C( $\alpha$ )-H | C( $\beta$ )-H | Others                                                                                                                                                              |
|------------------|------|-----------------|----------------|---------------------------------------------------------------------------------------------------------------------------------------------------------------------|
| Asn <sup>1</sup> | 8.10 | 4.62            | 2.31, 2.47     | N( $\delta$ )H=6.87, 7.29, NAc=1.83                                                                                                                                 |
| Hpg <sup>2</sup> | 8.02 | 5.51            |                | C( $\gamma$ )H=7.16, C( $\delta$ )H=6.68                                                                                                                            |
| Hpg <sup>3</sup> | 8.77 | 5.47            |                | C( $\gamma$ )H=6.98, C( $\delta$ )H=6.63                                                                                                                            |
| Tyr <sup>4</sup> | 8.81 | 4.35            | 2.65, 2.90     | C( $\delta$ )H=6.88, C( $\epsilon$ )H=6.56                                                                                                                          |
| COSCoA           | -    | -               | -              | 1=2.82, 2=3.11, 3=8.13, 4=2.28, 5=3.27,<br>3.34, 6=7.76, 7=3.77, 8=0.75, 9=0.95,<br>10=3.54, 3.91, 11=4.17, 12=4.38, 13=4.83,<br>14=4.73, 15=5.98, 16=8.54, 17=8.29 |

negative-ion ESI-MS:  $m/z = 1383.3$  ( $[M-H]^-$ ),  $1407.3$  ( $[M+Na-2H]^-$ ),  $1421.2$  ( $[M+K-2H]^-$ ).

*Tripeptide-S-CoA thioester 7C*

<sup>1</sup>H-NMR Chemical shift assignments (700 MHz, at 300 K, DMSO-d<sub>6</sub>).

| Residue          | NH   | C( $\alpha$ )-H | C( $\beta$ )-H | Others                                             |
|------------------|------|-----------------|----------------|----------------------------------------------------|
| Hpg <sup>1</sup> | 8.31 | 5.54            | -              | C( $\gamma$ )H=7.18, C( $\delta$ )H=6.67, NAc=1.85 |
| Hpg <sup>2</sup> | 8.64 | 5.49            | -              | C( $\gamma$ )H=6.95, C( $\delta$ )H=6.62           |
| Tyr <sup>3</sup> | 8.86 | 4.35            | 2.65, 2.92     | C( $\delta$ )H=6.88, C( $\epsilon$ )H=6.55         |
| COSCoA           | -    | -               | -              | 1=2.28, 2.84, 2=3.12, 3=8.14, 4=2.28,              |



5=3.25, 3.33, 6=7.77, 7=3.76, 8=0.76,  
9=0.95, 10=3.54, 3.91, 11=4.17, 12=4.40,  
13=4.81, 14=4.71, 15=5.99, 16=8.62,  
17=8.37

negative-ion ESI-MS:  $m/z = 1269.1$  ( $[M-H]^-$ ),  $1291.0$  ( $[M+Na-2H]^-$ ),  $1306.9$  ( $[M+K-2H]^-$ ).

*Tetrapeptide-S-CoA thioester 8C*

$^1H$ -NMR Chemical shift assignments (500 MHz, at 300 K, DMSO- $d_6$ ).

| Residue          | NH   | C( $\alpha$ )-H | C( $\beta$ )-H | Others                                                                                                                                                              |
|------------------|------|-----------------|----------------|---------------------------------------------------------------------------------------------------------------------------------------------------------------------|
| Ala <sup>1</sup> | 8.01 | 4.38            | 1.14           | NAc=1.82                                                                                                                                                            |
| Hpg <sup>2</sup> | 8.26 | 5.54            | -              | C( $\gamma$ )H=7.17, C( $\delta$ )H=6.67                                                                                                                            |
| Hpg <sup>3</sup> | 8.74 | 5.47            | -              | C( $\gamma$ )H=6.98, C( $\delta$ )H=6.62                                                                                                                            |
| Tyr <sup>4</sup> | 8.83 | 4.34            | 2.65, 2.91     | C( $\delta$ )H=6.88, C( $\epsilon$ )H=6.56                                                                                                                          |
| COSCoA           | -    | -               | -              | 1=2.82, 2=3.11, 3=8.15, 4=2.29, 5=3.25,<br>3.32, 6=7.77, 7=3.77, 8=0.75, 9=0.95,<br>10=3.50, 3.90, 11=4.15, 12=4.37, 13=4.82,<br>14=4.72, 15=5.97, 16=8.49, 17=8.25 |

negative-ion ESI-MS:  $m/z = 1340.6$  ( $[M-H]^-$ ),  $1362.3$  ( $[M+Na-2H]^-$ ),  $1378.2$  ( $[M+K-2H]^-$ ).

*Tetrapeptide-S-CoA thioester 9C*

$^1H$ -NMR Chemical shift assignments (500 MHz, at 300 K, DMSO- $d_6$ ).

| Residue          | NH   | C( $\alpha$ )-H | C( $\beta$ )-H | Others                                                                                                                                                              |
|------------------|------|-----------------|----------------|---------------------------------------------------------------------------------------------------------------------------------------------------------------------|
| Hpg <sup>1</sup> | 8.36 | 5.55            | -              | C( $\gamma$ )H=7.18, C( $\delta$ )H=6.64, NAc=1.87                                                                                                                  |
| Hpg <sup>2</sup> | 8.58 | 5.52            | -              | C( $\gamma$ )H=7.04, C( $\delta$ )H=6.59                                                                                                                            |
| Hpg <sup>3</sup> | 8.75 | 5.49            | -              | C( $\gamma$ )H=6.97, C( $\delta$ )H=6.62                                                                                                                            |
| Tyr <sup>4</sup> | 8.85 | 4.34            | 2.65, 2.91     | C( $\delta$ )H=6.89, C( $\epsilon$ )H=6.56                                                                                                                          |
| COSCoA           | -    | -               | -              | 1=2.83, 2=3.11, 3=8.15, 4=2.28, 5=3.26,<br>3.32, 6=7.77, 7=3.77, 8=0.75, 9=0.95,<br>10=3.49, 3.88, 11=4.15, 12=4.36, 13=4.82,<br>14=4.73, 15=5.96, 16=8.45, 17=8.21 |

negative-ion ESI-MS:  $m/z = 1418.4$  ( $[M-H]^-$ ),  $1440.4$  ( $[M+Na-2H]^-$ ),  $1456.3$  ( $[M+K-2H]^-$ ).

*Hexapeptide-S-CoA thioester 10C*

$^1H$ -NMR Chemical shift assignments (500 MHz, at 300 K, DMSO- $d_6$ ).

| Residue          | NH   | C( $\alpha$ )-H | C( $\beta$ )-H | Others                                                                                                                                                 |
|------------------|------|-----------------|----------------|--------------------------------------------------------------------------------------------------------------------------------------------------------|
| Leu <sup>1</sup> | 8.63 | 3.58            | 1.49, 1.54     | C( $\gamma$ )H=1.49, C( $\delta$ )H <sub>3</sub> =0.75, 0.83, NMe=1.99                                                                                 |
| Tyr <sup>2</sup> | 8.83 | 4.74            | 2.58, 2.95     | C( $\delta$ )H=7.04, C( $\epsilon$ )H=6.62                                                                                                             |
| Asn <sup>3</sup> | 8.51 | 4.64            | 2.35, 2.49     | N( $\delta$ )H=6.89, 7.32                                                                                                                              |
| Hpg <sup>4</sup> | 7.97 | 5.51            | -              | C( $\gamma$ )H=7.16, C( $\delta$ )H=6.66                                                                                                               |
| Hpg <sup>5</sup> | 8.78 | 5.51            | -              | C( $\gamma$ )H=6.96, C( $\delta$ )H=6.58                                                                                                               |
| Trp <sup>6</sup> | 8.87 | 4.47            | 2.90, 3.14     | C( $\delta$ )H=7.00, C( $\epsilon$ )H=7.33, 7.43, C( $\phi$ )H=6.92, 7.03, NH=9.23                                                                     |
| COSCoA           | -    | -               | -              | 1=2.77, 2=2.86, 2=3.11, 3=8.16, 4=2.29, 5=3.31, 6=7.77, 7=3.80, 8=0.74, 9=0.95, 10=3.59, 11=4.14, 12=4.36, 13=4.84, 14=4.76, 15=5.94, 16=8.44, 17=8.18 |

negative-ion ESI-MS:  $m/z = 1655.5$  ( $[M-H]^-$ ),  $1677.6$  ( $[M+Na-2H]^-$ ),  $1692.5$  ( $[M+K-2H]^-$ ).

*Tripeptide-S-CoA thioester 11C*

$^1H$ -NMR Chemical shift assignments (500 MHz, at 300 K, DMSO- $d_6$ ).

| Residue          | NH   | C( $\alpha$ )-H | C( $\beta$ )-H | Others                                                                                                                                                     |
|------------------|------|-----------------|----------------|------------------------------------------------------------------------------------------------------------------------------------------------------------|
| Tyr <sup>1</sup> | 7.91 | 4.35            | 2.51, 2.77     | C( $\delta$ )H=6.99, C( $\epsilon$ )H=6.61, NAc=1.71                                                                                                       |
| Tyr <sup>2</sup> | 7.91 | 4.46            | 2.63, 2.93     | C( $\delta$ )H=6.95, C( $\epsilon$ )H=6.60                                                                                                                 |
| Tyr <sup>3</sup> | 8.62 | 4.48            | 2.82, 2.95     | C( $\delta$ )H=7.02, C( $\epsilon$ )H=6.65                                                                                                                 |
| COSCoA           | -    | -               | -              | 1=2.84, 2=3.12, 3=8.12, 4=2.26, 5=3.24, 3.32, 6=7.74, 7=3.78, 8=0.72, 9=0.95, 10=3.46, 3.90, 11=4.13, 12=4.36, 13=4.83, 14=4.73, 15=5.94, 16=8.43, 17=8.17 |

negative-ion ESI-MS:  $m/z = 1298.1$  ( $[M-H]^-$ ),  $1320.4$  ( $[M+Na-2H]^-$ ).

*Tripeptide-S-CoA thioester 12C*

<sup>1</sup>H-NMR Chemical shift assignments (500 MHz, at 300 K, DMSO-d<sub>6</sub>).

| Residue          | NH   | C(α)-H | C(β)-H     | Others                                                                                                                                                     |
|------------------|------|--------|------------|------------------------------------------------------------------------------------------------------------------------------------------------------------|
| Tyr <sup>1</sup> | 7.92 | 4.36   | 2.53, 2.78 | C(δ)H=6.96, C(ε)H=6.61, NAc=1.72                                                                                                                           |
| Tyr <sup>2</sup> | 7.80 | 4.45   | 2.48, 2.65 | C(δ)H=6.79, C(ε)H=6.57                                                                                                                                     |
| Tyr <sup>3</sup> | 8.69 | 4.44   | 2.71, 3.00 | C(δ)H=7.06, C(ε)H=6.65                                                                                                                                     |
| COSSCoA          | -    | -      | -          | 1=2.88, 2=3.16, 3=8.13, 4=2.27, 5=3.24, 3.32, 6=7.75, 7=3.77, 8=0.75, 9=0.94, 10=3.55, 3.91, 11=4.19, 12=4.40, 13=4.81, 14=4.72, 15=5.99, 16=8.63, 17=8.38 |

negative-ion ESI-MS:  $m/z = 1298.0$  ([M-H]<sup>-</sup>).

The identity of each peptide-PCP-7S conjugates was confirmed by MALDI-MS:

**5D**,  $m/z 11479 \pm 2$  [M+H]<sup>+</sup>, calcd mass 11478;

**6D**,  $m/z 11313 \pm 2$  [M+H]<sup>+</sup>, calcd mass 11315;

**7D**,  $m/z 11201 \pm 2$  [M+H]<sup>+</sup>, calcd mass 11201;

**8D**,  $m/z 11273 \pm 2$  [M+H]<sup>+</sup>, calcd mass 11273;

**9D**,  $m/z 11351 \pm 2$  [M+H]<sup>+</sup>, calcd mass 11351;

**10D**,  $m/z 11588 \pm 2$  [M+H]<sup>+</sup>, calcd mass 11586;

**11D**,  $m/z 11227 \pm 2$  [M+H]<sup>+</sup>, calcd mass 11229;

**12D**,  $m/z 11229 \pm 2$  [M+H]<sup>+</sup>, calcd mass 11229.

**OxyB activity assays**

The OxyB assay was as described. The peptide hydrazide products were purified by analytical HPLC and analyzed by MS and 1D and 2D <sup>1</sup>H-NMR spectroscopy. NMR assignments were made by standard methods, using 2D DQF-COSY, TOCSY and NOESY spectra, and are given below.

*Monocyclic pentapeptide hydrazide 13*<sup>1</sup>H-NMR Chemical shift assignments (600 MHz, at 300 K, DMSO-d<sub>6</sub>).

| <b>Residue</b>      | <b>NH</b> | <b>C(α)-H</b> | <b>C(β)-H</b> | <b>Others</b>                                         |
|---------------------|-----------|---------------|---------------|-------------------------------------------------------|
| Tyr <sup>1</sup>    | 8.02      | 4.42          | 2.57, 2.82    | C(δ)H=7.00, C(ε)H=6.62, OH=9.13,<br>NAc=1.72          |
| Asn <sup>2</sup>    | 8.34      | 4.66          | 2.35, 2.50    | N(δ)H=6.96, 7.33                                      |
| Hpg <sup>3</sup>    | 7.97      | 5.27          | -             | C(γ1)H=5.90, C(γ2)H=6.64,<br>C(δ)H=6.77, OH=9.41,     |
| Hpg <sup>4</sup>    | 8.88      | 5.23          | -             | C(γ)H=7.08, C(δ)H=6.68, OH=9.40                       |
| Tyr <sup>5</sup>    | 7.39      | 4.65          | 2.92, 3.27    | C(δ1)H=7.22, C(δ2)H=7.28,<br>C(ε1)H=6.94, C(ε2)H=7.09 |
| CONHNH <sub>2</sub> | -         | -             | -             | 7.15, 7.07, 7.01                                      |

ESI-MS/MS (MeCN/H<sub>2</sub>O 1:1 + HCOOH 0.1%): *m/z* 320.0 (b<sub>2</sub>), 779.3 (b<sub>5</sub>), 492.1 (y<sub>3</sub>), 606.3 (y<sub>4</sub>), 475.1 (z<sub>3</sub>), 589.2 (z<sub>4</sub>).

*Linear tetrapeptide-hydrazide 6E*<sup>1</sup>H-NMR Chemical shift assignments (600 MHz, at 300 K, DMSO-d<sub>6</sub>).

| <b>Residue</b>      | <b>NH</b> | <b>C(α)-H</b> | <b>C(β)-H</b> | <b>Others</b>                   |
|---------------------|-----------|---------------|---------------|---------------------------------|
| Asn <sup>1</sup>    | 8.12      | 4.61          | 2.30, 2.46    | N(δ)H=6.89, 7.29, NAc=1.83      |
| Hpg <sup>2</sup>    | 8.06      | 5.46          | -             | C(δ)H=7.17, C(ε)H=6.67, OH=9.36 |
| Hpg <sup>3</sup>    | 8.64      | 5.38          | -             | C(γ)H=7.01, C(δ)H=6.63, OH=9.34 |
| Tyr <sup>4</sup>    | 8.31      | 4.26          | 2.56, 2.70    | C(γ)H=6.81, C(δ)H=6.52, OH=9.14 |
| CONHNH <sub>2</sub> | -         | -             | -             | 7.16, 7.07, 6.99                |

ESI-MS/MS (MeCN/H<sub>2</sub>O 1:1 + HCOOH 0.1%): *m/z* 427.1 (a<sub>3</sub>), 306.1 (b<sub>2</sub>), 455.1 (b<sub>3</sub>), 618.2 (b<sub>4</sub>), 328.1 (z<sub>2</sub>).

*Monocyclic tripeptide hydrazide 14*<sup>1</sup>H-NMR Chemical shift assignments (600 MHz, at 300 K, DMSO-d<sub>6</sub>).

| Residue             | NH   | C( $\alpha$ )-H | C( $\beta$ )-H | Others                                                                                        |
|---------------------|------|-----------------|----------------|-----------------------------------------------------------------------------------------------|
| Hpg <sup>1</sup>    | 8.44 | 5.27            | -              | C( $\gamma$ 1)H=5.84, C( $\gamma$ 2)H=6.69 C( $\delta$ )H=6.80,<br>OH=9.39, NAc=1.78          |
| Hpg <sup>2</sup>    | 8.88 | 5.21            | -              | C( $\gamma$ )H=7.08, C( $\delta$ )H=6.67, OH=9.42                                             |
| Tyr <sup>3</sup>    | 7.38 | 4.69            | 2.89, 3.27     | C( $\delta$ 1)H=7.21, C( $\delta$ 2)H=7.28,<br>C( $\epsilon$ 1)H=6.95, C( $\epsilon$ 2)H=7.10 |
| CONHNH <sub>2</sub> | -    | -               | -              | 7.16, 7.07, 6.99                                                                              |

ESI-MS/MS (MeCN/H<sub>2</sub>O 1:1 + HCOOH 0.1%):  $m/z$  502.1 (b<sub>3</sub>), 517.2 (x<sub>3</sub>), 492.0 (y<sub>3</sub>), 475.1 (z<sub>3</sub>).

*Linear and monocyclic tetrapeptide hydrazide 8E + 15*

The mixture of linear (**8E**) and monocyclic peptide hydrazide (**15**) was isolated and used to derive assignments for each molecule by <sup>1</sup>H-NMR (600MHz, at 300K, DMSO-d<sub>6</sub>).

*Peptide 8E:*

| Residue             | NH   | C( $\alpha$ )-H | C( $\beta$ )-H | Others                                              |
|---------------------|------|-----------------|----------------|-----------------------------------------------------|
| Ala <sup>1</sup>    | 8.03 | 4.38            | 1.14           | NAc=1.82                                            |
| Hpg <sup>2</sup>    | 8.31 | 5.48            | -              | C( $\gamma$ )H=7.18, C( $\delta$ )H=6.70, OH=9.37   |
| Hpg <sup>3</sup>    | 8.62 | 5.31            | -              | C( $\gamma$ )H=7.06, C( $\delta$ )H=6.67, OH=9.42   |
| Tyr <sup>4</sup>    | 7.96 | 4.29            | 2.62, 2.80     | C( $\delta$ )H=6.89, C( $\epsilon$ )H=6.61, OH=9.18 |
| CONHNH <sub>2</sub> | -    | -               | -              | 7.00, 7.08, 7.16                                    |

ESI-MS/MS (MeCN/H<sub>2</sub>O 1:1 + HCOOH 0.1%):  $m/z$  384.2 (a<sub>3</sub>), 412.3 (b<sub>3</sub>), 575.3 (b<sub>4</sub>).

*Peptide 15:*

| Residue          | NH   | C( $\alpha$ )-H | C( $\beta$ )-H | Others                                                                      |
|------------------|------|-----------------|----------------|-----------------------------------------------------------------------------|
| Ala <sup>1</sup> | 8.02 | 4.44            | 1.20           | NAc=1.81                                                                    |
| Hpg <sup>2</sup> | 8.33 | 5.27            | -              | C( $\gamma$ 1)H=5.85, C( $\gamma$ 2)H=6.63, C( $\delta$ )H=6.79,<br>OH=9.41 |
| Hpg <sup>3</sup> | 8.88 | 5.23            | -              | C( $\gamma$ )H=7.07, C( $\delta$ )H=6.65, OH=9.38                           |

|                     |      |      |            |                                                       |
|---------------------|------|------|------------|-------------------------------------------------------|
| Tyr <sup>4</sup>    | 7.38 | 4.67 | 2.90, 3.27 | C(δ1)H=7.22, C(δ2)H=7.28,<br>C(ε1)H=6.94, C(ε2)H=7.09 |
| CONHNH <sub>2</sub> | -    | -    | -          | 7.00, 7.08, 7.16                                      |

ESI-MS/MS (MeCN/H<sub>2</sub>O 1:1 + HCOOH 0.1%): *m/z* 573.1 (b<sub>4</sub>), 492.3 (y<sub>3</sub>), 563.0 (y<sub>4</sub>), 475.2 (z<sub>3</sub>).

*Linear and monocyclic tetrapeptide hydrazide 9E + 16*

The mixture of linear (**9E**) and monocyclic peptide hydrazide (**16**) was isolated and used to derive assignments for each molecule by <sup>1</sup>H-NMR (600MHz, at 300K, DMSO-d<sub>6</sub>).

*Peptide 9E:*

| Residue             | NH   | C(α)-H | C(β)-H     | Others                                       |
|---------------------|------|--------|------------|----------------------------------------------|
| Hpg <sup>1</sup>    | 8.39 | 5.55   | -          | C(γ)H=7.18, C(δ)H=6.65, OH=9.33,<br>NAc=1.86 |
| Hpg <sup>2</sup>    | 8.64 | 5.46   | -          | C(γ)H=7.05, C(δ)H=6.63, OH=9.34              |
| Hpg <sup>3</sup>    | 8.64 | 5.32   | -          | C(γ)H=7.06, C(δ)H=6.66, OH=9.382             |
| Tyr <sup>4</sup>    | 7.93 | 4.29   | 2.60, 2.80 | C(δ)H=6.89, C(ε)H=6.60, OH=9.18              |
| CONHNH <sub>2</sub> | -    | -      | -          | 6.99, 7.07, 7.16                             |

ESI-MS/MS (MeCN/H<sub>2</sub>O 1:1 + HCOOH 0.1%): *m/z* 462.2 (a<sub>3</sub>), 490.2 (b<sub>3</sub>), 653,4 (b<sub>4</sub>).

*Peptide 16:*

| Residue             | NH   | C(α)-H | C(β)-H     | Others                                                |
|---------------------|------|--------|------------|-------------------------------------------------------|
| Hpg <sup>1</sup>    | 8.38 | 5.59   | -          | C(γ)H=7.26, C(δ)H=6.69, OH=9.377,<br>NAc=1.86         |
| Hpg <sup>2</sup>    | 8.65 | 5.23   | -          | C(γ1)H=5.78, C(γ2)H=6.21, C(δ)H=6.57,<br>OH=9.36      |
| Hpg <sup>3</sup>    | 8.90 | 5.24   | -          | C(γ)H=7.08, C(δ)H=6.67, OH=9.43                       |
| Tyr <sup>4</sup>    | 7.39 | 4.66   | 2.90, 3.26 | C(δ1)H=7.20, C(δ2)H=7.26,<br>C(ε1)H=6.92, C(ε2)H=7.05 |
| CONHNH <sub>2</sub> | -    | -      | -          | 6.99, 7.07, 7.16                                      |

ESI-MS/MS (MeCN/H<sub>2</sub>O 1:1 + HCOOH 0.1%): *m/z* 651.2 (b<sub>4</sub>), 492.3 (y<sub>3</sub>), 475.2 (z<sub>3</sub>), 624.6 (z<sub>4</sub>).

*Linear hexapeptide-hydrazide 10E*

<sup>1</sup>H-NMR Chemical shift assignments (600 MHz, at 300 K, DMSO-d<sub>6</sub>).

| Residue             | NH   | C(α)-H | C(β)-H     | Others                                                     |
|---------------------|------|--------|------------|------------------------------------------------------------|
| Leu <sup>1</sup>    | 8.66 | 3.59   | 1.40, 1.50 | C(γ)H=1.50, C(δ)H <sub>3</sub> =0.79, 0.85, NMe=1.95       |
| Tyr <sup>2</sup>    | 8.82 | 4.77   | 2.57, 2.97 | C(δ)H=7.05, C(ε)H=6.63, OH=9.18                            |
| Asn <sup>3</sup>    | 8.46 | 4.67   | 2.33, 2.46 | N(δ)H=6.95, 7.33                                           |
| Hpg <sup>4</sup>    | 8.10 | 5.51   | -          | C(γ)H=7.19, C(δ)H=6.67, OH=9.37                            |
| Hpg <sup>5</sup>    | 8.73 | 5.41   | -          | C(γ)H=6.99, C(δ)H=6.58, OH=9.31                            |
| Trp <sup>6</sup>    | 8.36 | 4.42   | 2.80, 2.95 | C(δ)H=6.92, C(ε)H=7.30, 7.51, C(φ)H=6.94,<br>7.03, NH=9.37 |
| CONHNH <sub>2</sub> |      |        |            | 7.02, 7.08, 7.17                                           |

ESI-MS/MS (MeCN/H<sub>2</sub>O 1:1 + HCOOH 0.1%): *m/z* 526.4 (a<sub>4</sub>), 405.3 (b<sub>3</sub>), 554.4 (b<sub>4</sub>), 703.5 (b<sub>5</sub>), 889.5 (b<sub>6</sub>), 571.4 (c<sub>4</sub>).

A minor product (≈20%) isolated from the assay with peptide **10D** was assigned as an epimer of **10E**, with the following chemical shift assignments (600 MHz, at 300 K, DMSO-d<sub>6</sub>):

| Residue             | NH   | C(α)-H | C(β)-H     | Others                                                    |
|---------------------|------|--------|------------|-----------------------------------------------------------|
| Leu <sup>1</sup>    | 8.66 | 3.59   | 1.40, 1.50 | C(γ)H=1.50, C(δ)H <sub>3</sub> =0.79, 0.85, NMe=1.95      |
| Tyr <sup>2</sup>    | 8.82 | 4.77   | 2.97, 2.57 | C(δ)H=7.05, C(ε)H=6.63, OH=9.18                           |
| Asn <sup>3</sup>    | 8.46 | 4.67   | 2.46, 2.33 | N(δ)H=7.33, 6.95                                          |
| Hpg <sup>4</sup>    | 8.10 | 5.51   | -          | C(γ)H=7.19, C(δ)H=6.69, OH=9.37                           |
| Hpg <sup>5</sup>    | 8.76 | 5.35   | -          | C(γ)H=7.08, C(δ)H=6.64, OH=9.38                           |
| Trp <sup>6</sup>    | 8.03 | 4.41   | 2.84, 3.03 | C(δ)H=6.92, C(ε)H=7.31, 7.48 C(φ)H=6.94,<br>7.03, NH=9.40 |
| CONHNH <sub>2</sub> |      |        |            | 6.99, 7.08, 7.17                                          |

ESI-MS (MeCN/H<sub>2</sub>O 1:1 + HCOOH 0.1%): *m/z* = 921.6 ([M+H]<sup>+</sup>).

*Linear tripeptide-hydrazide 11E*<sup>1</sup>H-NMR Chemical shift assignments (600 MHz, at 300 K, DMSO-d<sub>6</sub>).

| <b>Residue</b>      | <b>NH</b> | <b>C(α)-H</b> | <b>C(β)-H</b> | <b>Others</b>                                |
|---------------------|-----------|---------------|---------------|----------------------------------------------|
| Tyr <sup>1</sup>    | 7.96      | 4.35          | 2.53, 2.80    | C(γ)H=6.97, C(δ)H=6.60, OH=9.13,<br>NAc=1.72 |
| Tyr <sup>2</sup>    | 7.89      | 4.37          | 2.63, 2.84    | C(γ)H=6.96, C(δ)H=6.61, OH=9.14              |
| Tyr <sup>3</sup>    | 8.02      | 4.36          | 2.72, 2.82    | C(γ)H=6.99, C(δ)H=6.64, OH=9.18              |
| CONHNH <sub>2</sub> | -         | -             | -             | 7.16, 7.08, 6.99                             |

ESI-MS/MS (MeCN/H<sub>2</sub>O 1:1 + HCOOH 0.1%): *m/z* 178.0 (a<sub>1</sub>), 504.3 (a<sub>3</sub>), 369.2 (b<sub>2</sub>), 532.4 (b<sub>3</sub>), 547.5 (x<sub>3</sub>).*Linear tripeptide-hydrazide 12E*<sup>1</sup>H-NMR Chemical shift assignments (600 MHz, at 300 K, DMSO-d<sub>6</sub>).

| <b>Residue</b>      | <b>NH</b> | <b>C(α)-H</b> | <b>C(β)-H</b> | <b>Others</b>                                |
|---------------------|-----------|---------------|---------------|----------------------------------------------|
| Tyr <sup>1</sup>    | 7.99      | 4.30          | 2.51, 2.77    | C(γ)H=6.95, C(δ)H=6.60, OH=9.14,<br>NAc=1.73 |
| Tyr <sup>2</sup>    | 7.68      | 4.42          | 2.45, 2.70    | C(γ)H=6.74, C(δ)H=6.55, OH=9.11              |
| Tyr <sup>3</sup>    | 8.34      | 4.38          | 2.66, 2.85    | C(γ)H=7.06, C(δ)H=6.64, OH=9.17              |
| CONHNH <sub>2</sub> | -         | -             | -             | 7.16, 7.08, 6.99                             |

ESI-MS/MS (MeCN/H<sub>2</sub>O 1:1 + HCOOH 0.1%): *m/z* 504.3 (a<sub>3</sub>), 369.3 (b<sub>2</sub>), 532.3 (b<sub>3</sub>), 196.0 (y<sub>1</sub>), 359.3 (y<sub>2</sub>).
